# Supplementary material
Source: PubMed Central journal article supplement (PMC2077045)

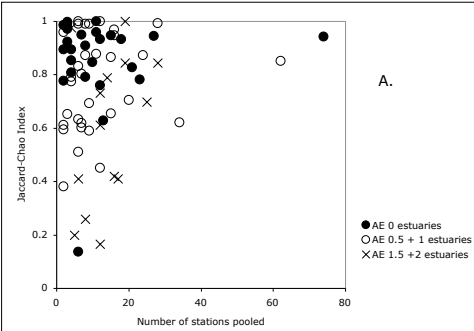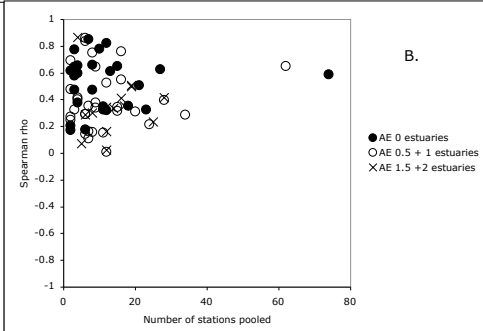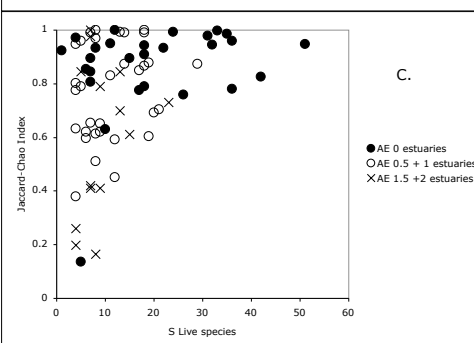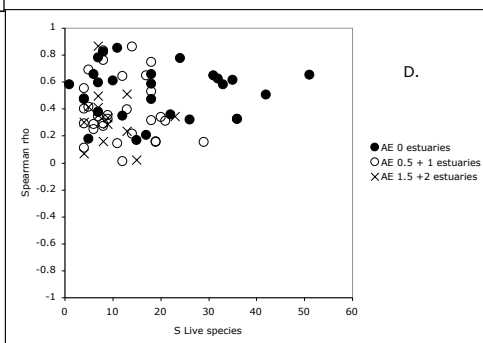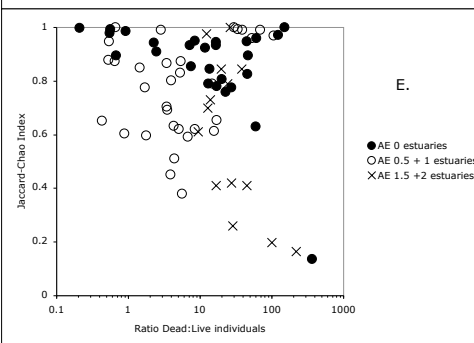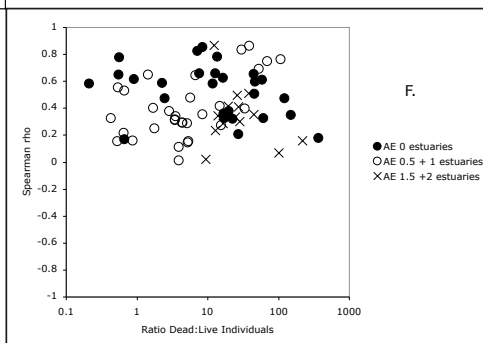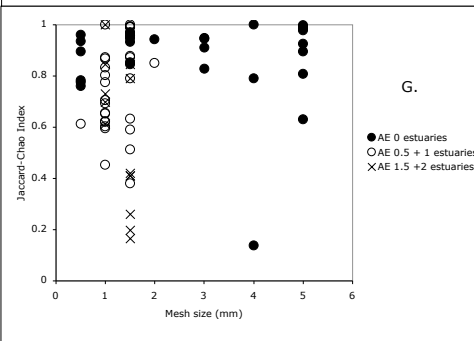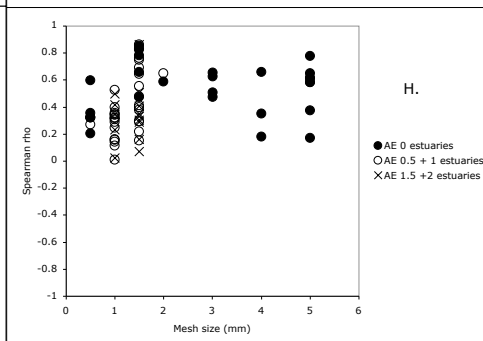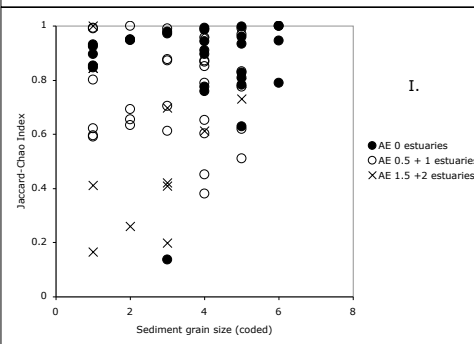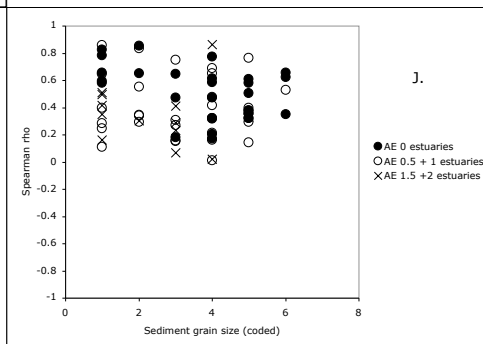

Supplement: pnas_0707194104_1.pdf [file pnas_0707194104_1.pdf]

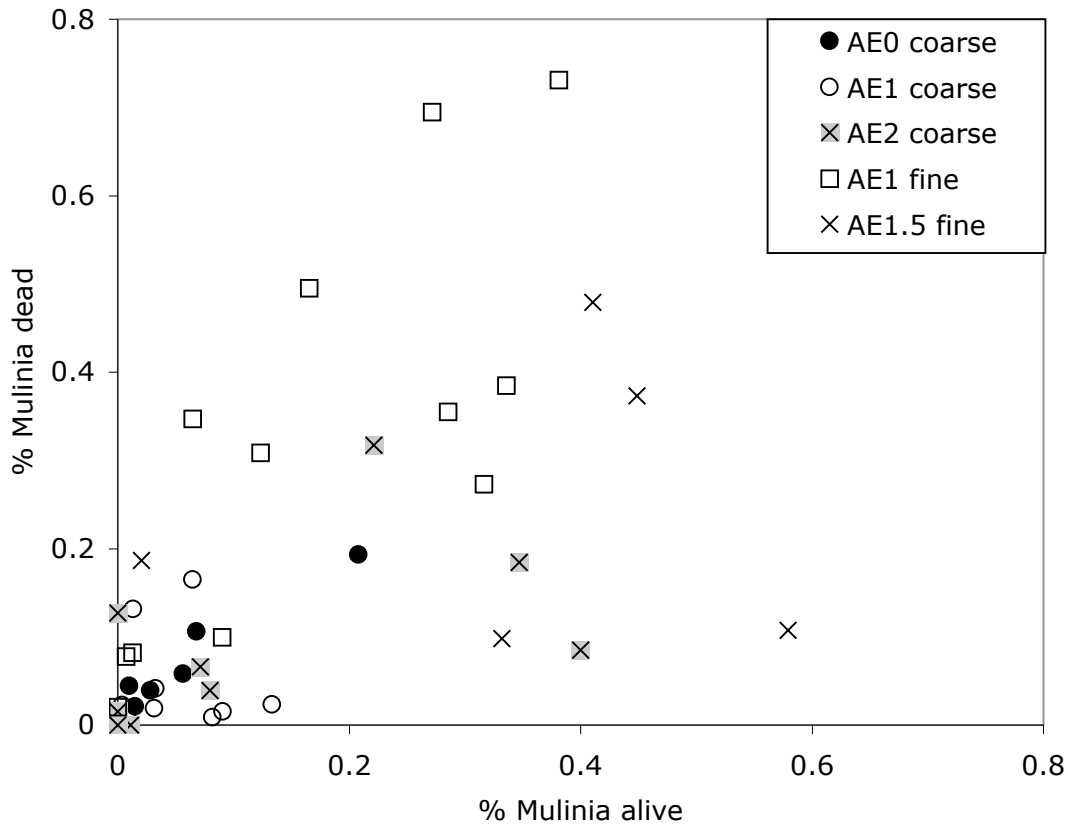

Supplement: pnas_0707194104_2.pdf [file pnas_0707194104_2.pdf]

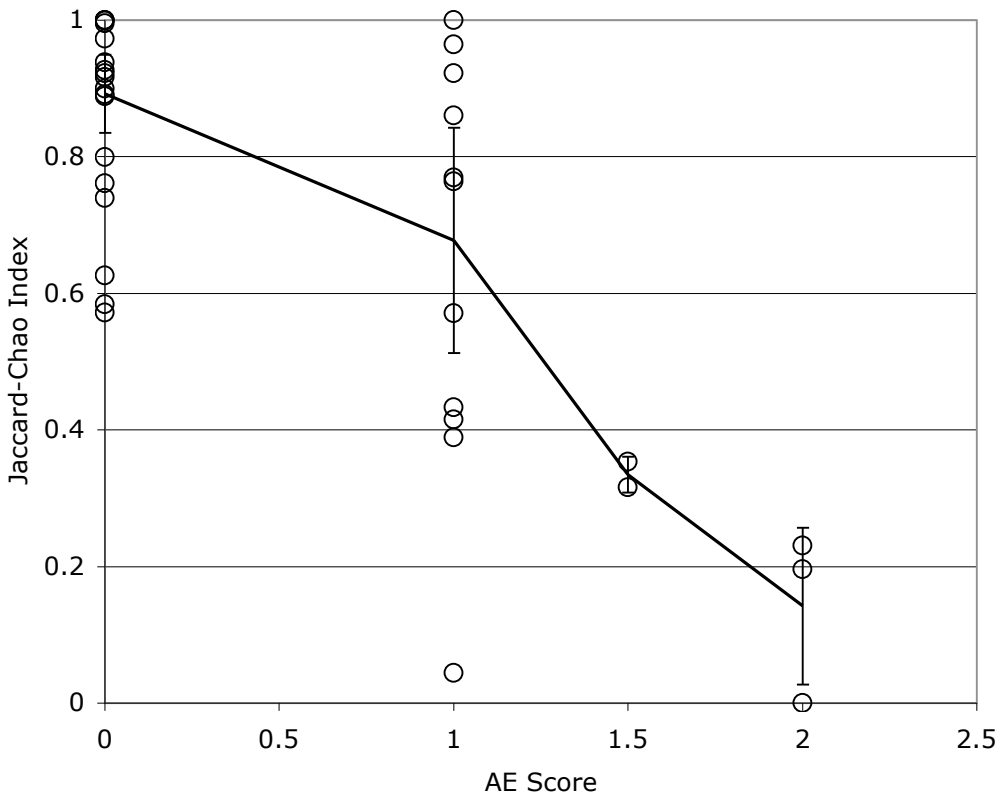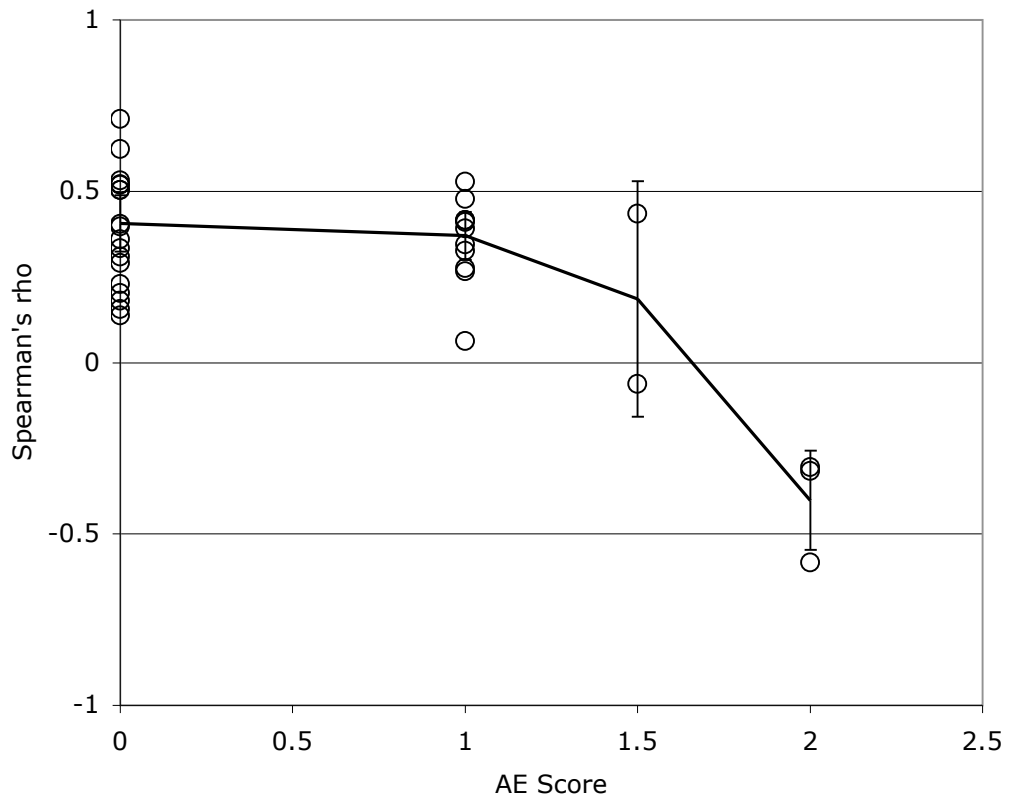

Supplement: pnas_0707194104_3.pdf [file pnas_0707194104_3.pdf]

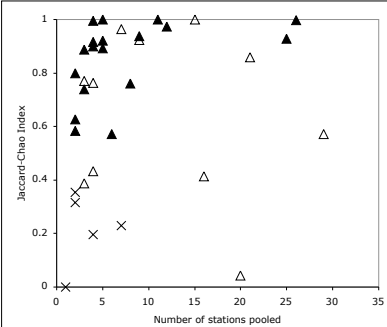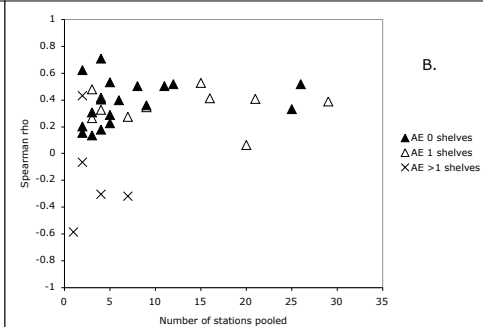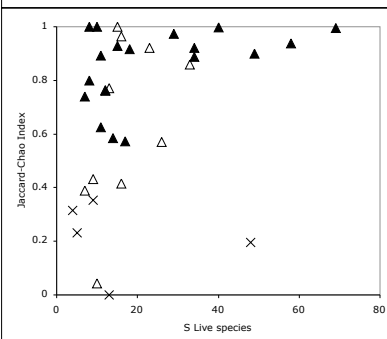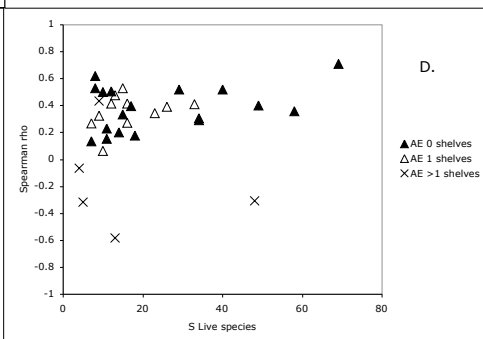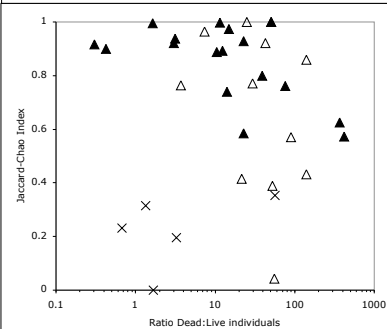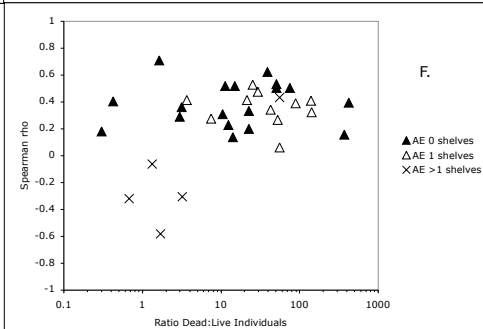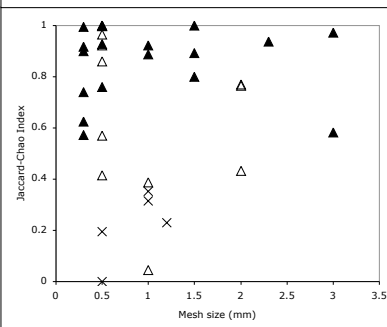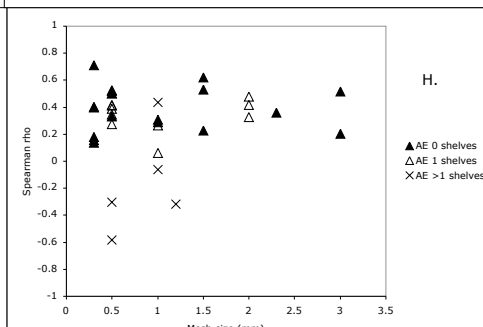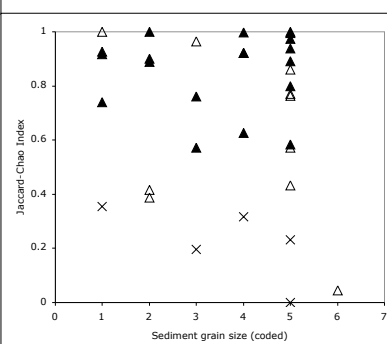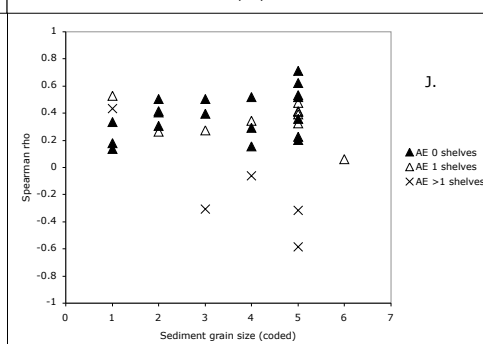

Supplement: pnas_0707194104_4.pdf [file pnas_0707194104_4.pdf]

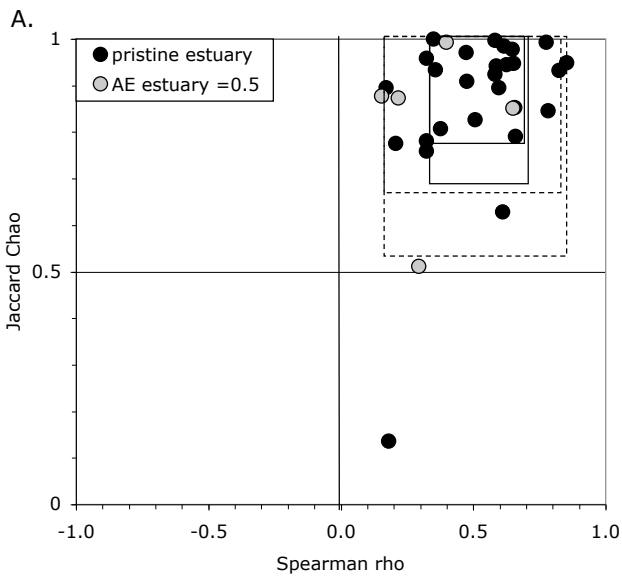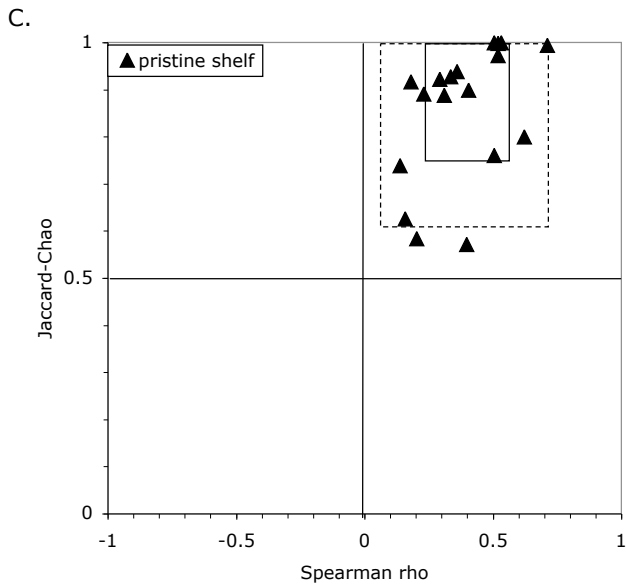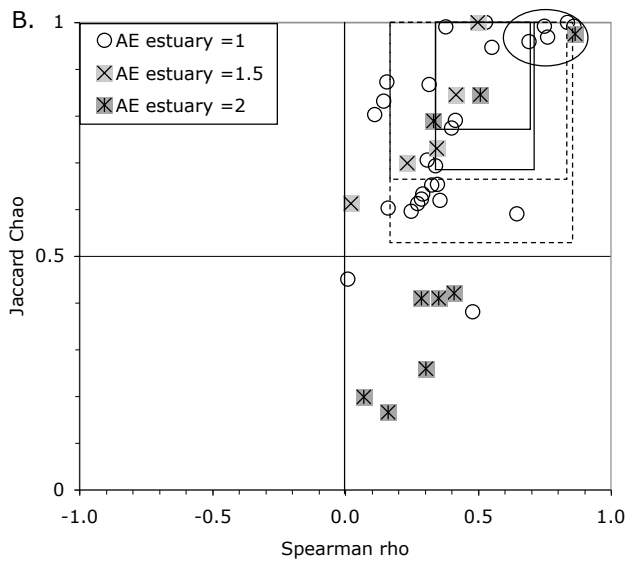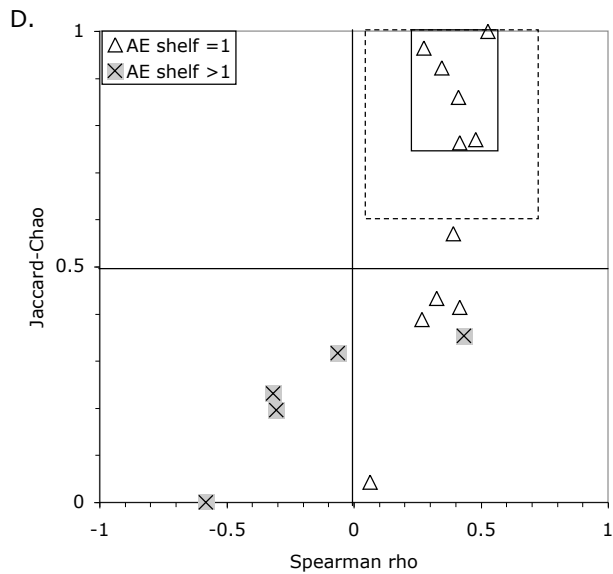

Supplement: pnas_0707194104_5.pdf [file pnas_0707194104_5.pdf]
